# Supplementary material for: Sustainable green synthesis of CeO2–ZnO nanocomposites using Rhazya stricta: enhanced synergistic solutions for biomedical challenges and environmental remediation
Source: Royal Society of Chemistry journal article supplement (doi:10.1039/d6ra02267g), 2026-05-06
Supplement: d6ra02267g1.pdf [file d6ra02267g1.pdf]

## **Sustainable Green Synthesis of CeO<sub>2</sub>-ZnO Nanocomposites using *Rhazya stricta*: Enhanced Synergistic Solutions for Biomedical Challenges and Environmental Remediation**

**Amjid Khan<sup>1,2,3\*</sup>, Tauqeer Ahmed Qadri<sup>4</sup>, Rashid Abbas Khan<sup>1,2,3</sup>, Dilawar Hassan<sup>1,2,3</sup>, Bushra Ashiq<sup>5</sup>, Ayesha Sani<sup>1,2,3</sup>, Zabta Khan Shinwari<sup>6</sup>, Malik Maaza<sup>1,2,3\*</sup>**

<sup>1</sup>UNESCO-UNISA Africa Chair in Nanosciences and Nanotechnologies, College of Graduate Studies, University of South Africa, 1 Preller Street, Muckleneuk Ridge, P.O. Box 392, Pretoria, Gauteng Province, 0003, South Africa

<sup>2</sup>Nanosciences African Network (NANOAFNET), Materials Research Department, iThemba LABS-National Research Foundation, Western Cape Province, South Africa

<sup>3</sup>African Centre of Competencies in Enhanced Nanosciences & Nanotechnologies for SDGs (ACCENTS), 1 Preller Street, Muckleneuk Ridge, P.O. Box 392, Pretoria, Gauteng Province, 0003, South Africa

<sup>4</sup>Department of Biosciences, COMSATS University Islamabad, Islamabad-45550, Pakistan

<sup>5</sup>Department of Biomedical Engineering, Research Center for Nano-biomaterials & AMP; Regenerative Medicine, College of Artificial Intelligence, Taiyuan University of Technology, Taiyuan 030024, PR China

<sup>6</sup>Department of Plant Sciences, Faculty of Biological Sciences, Quaid-i-Azam University, Islamabad, 45320, Pakistan

### **\* Correspondence:**

Amjid Khan. Email: [khana2@unisa.ac.za](mailto:khana2@unisa.ac.za)

Malik Maaza. Email: [maazam@unisa.ac.za](mailto:maazam@unisa.ac.za)

**Table S1.** FTIR Absorption Bands and Functional Group Assignments of RS Extract, CeNPs, ZnNPs, and Ce-Zn Nc.

| Sample          | Wavenumber<br>( $\text{cm}^{-1}$ ) | Assigned Functional Group<br>(s) | Possible Chemical Bonds / Vibrations |
|-----------------|------------------------------------|----------------------------------|--------------------------------------|
| <b>RS</b>       | 2925                               | C–H stretching                   | Alkanes/Terpenoids                   |
|                 | 1645                               | C=O / N–H Stretching             | Amide I (Proteins)                   |
|                 | 1052                               | C–O stretching                   | Ethers/Alcohols                      |
| <b>CeNPs</b>    | 3392                               | O–H stretching                   | Capping interaction                  |
|                 | 2913                               | C–H stretching                   | Alkanes                              |
|                 | 1612                               | C=O stretching                   | Carbonyl groups                      |
|                 | 523                                | Ce–O Stretching                  | Cerium Oxide formation               |
| <b>ZnNPs</b>    | 3371                               | O–H stretching                   | Polyphenol involvement               |
|                 | 1602                               | C=O stretching                   | Amides/Carbonyls                     |
|                 | 544                                | Zn–O stretching                  | Zinc Oxide formation                 |
| <b>Ce-Zn Nc</b> | 3292                               | O–H Stretching                   | Capping stabilization                |
|                 | 1705                               | C=O Stretching                   | Carboxylic acids                     |
|                 | 1516                               | Aromatic C=C Stretching          | Flavonoids/Aromatic rings            |
|                 | 515                                | M–O Stretching                   | Bimetallic Oxide junction            |

**Table S2.** Raman Shift Bands and Functional Group Assignments of CeNPs, ZnNPs, and Ce-Zn Nc.

| Sample          | Raman Shift (cm <sup>-1</sup> ) | Assigned Vibrations  | Possible Chemical Bonds / Functional Groups |
|-----------------|---------------------------------|----------------------|---------------------------------------------|
| <b>CeNPs</b>    | 70                              | Lattice vibrations   | Metal oxide lattice modes                   |
|                 | 2919                            | C-H stretching       | Alkanes/Methyl groups                       |
|                 | 3525                            | O-H / N-H stretching | Hydroxyl/Amine groups                       |
| <b>ZnNPs</b>    | 76                              | Lattice vibrations   | Metal oxide lattice modes                   |
|                 | 3017                            | C-H stretching       | Alkanes/Capping residues                    |
|                 | 3526                            | O-H stretching       | Hydroxyl groups                             |
| <b>Ce-Zn Nc</b> | 68                              | Lattice vibrations   | Bimetallic lattice modes                    |
|                 | 2927                            | C-H stretching       | Alkanes                                     |
|                 | 3411                            | O-H / N-H stretching | Hydroxyl/Amine groups                       |
